# Supplementary material
Source: MDPI journal article supplement (https://www.mdpi.com/1999-4907/13/12/2029)
Supplement: s1 [file s1 › forests-2037722-supplementary.pdf]

**Supplementary Table S1.** Search strategy for the review.

---

**PubMed and Cochrane Library**

---

1. Disease; colonic polyp  
("Health"[Mesh] OR "Adolescent Health"[Mesh] OR "Child Health"[Mesh] OR Wellbeing[tiab] OR Well-being[tiab])
  2. Intervention  
("Forests"[Mesh] OR "Wood"[Mesh] OR "Shinrin-Yoku"[tiab] OR "Forest bath"[tiab] OR "green environment"[tiab])
- 

---

**Embase**

---

1. Disease; colonic polyp  
(wellbeing'/exp OR 'health'/exp OR 'well-bing':ti,ab OR 'wellbeing':ti,ab)
  2. Intervention  
(forest'/exp OR 'wood'/exp OR 'shinrin-yoku':ti,ab OR 'forest bath':ti,ab OR 'green environment':ti,ab)
- 

---

**RISS (manual search)**

---

1. Disease; colonic polyp  
("Health" | "Adolescent Health" | "Child Health" | "Wellbeing" | "Well-being" | "건강" | "웰빙" | "심신" | "치유" | "치료" | "힐링" | "Therapy" | "테라피")
  2. Intervention  
("Forests" | "Wood" | "Shinrin-Yoku" | "Forest bath" | "green environment" | "삼림" | "산림" | "숲" | "나무" | "삼림욕" | "산림욕")
-

Supplementary Table S2. MOOSE checklist for meta-analyses of observational studies.

| Item No <sup>↵</sup>                                     | Recommendation <sup>↵</sup>                                                                                                                                                                                                                                                               | Reported on Page No <sup>↵</sup>  |
|----------------------------------------------------------|-------------------------------------------------------------------------------------------------------------------------------------------------------------------------------------------------------------------------------------------------------------------------------------------|-----------------------------------|
| Reporting of background should include <sup>↵</sup>      |                                                                                                                                                                                                                                                                                           |                                   |
| 1 <sup>↵</sup>                                           | Problem definition <sup>↵</sup>                                                                                                                                                                                                                                                           | 4 <sup>↵</sup>                    |
| 2 <sup>↵</sup>                                           | Hypothesis statement <sup>↵</sup>                                                                                                                                                                                                                                                         | — <sup>↵</sup>                    |
| 3 <sup>↵</sup>                                           | Description of study outcome(s) <sup>↵</sup>                                                                                                                                                                                                                                              | 7 <sup>↵</sup>                    |
| 4 <sup>↵</sup>                                           | Type of exposure or intervention used <sup>↵</sup>                                                                                                                                                                                                                                        | 4-6 <sup>↵</sup>                  |
| 5 <sup>↵</sup>                                           | Type of study designs used <sup>↵</sup>                                                                                                                                                                                                                                                   | 5-7 <sup>↵</sup>                  |
| 6 <sup>↵</sup>                                           | Study population <sup>↵</sup>                                                                                                                                                                                                                                                             | 6 <sup>↵</sup>                    |
| Reporting of search strategy should include <sup>↵</sup> |                                                                                                                                                                                                                                                                                           |                                   |
| 7 <sup>↵</sup>                                           | Qualifications of searchers (eg, librarians and investigators) <sup>↵</sup>                                                                                                                                                                                                               | 5, Title page <sup>↵</sup>        |
| 8 <sup>↵</sup>                                           | Search strategy, including time period included in the synthesis and key words <sup>↵</sup>                                                                                                                                                                                               | 5, Table 1 <sup>↵</sup>           |
| 9 <sup>↵</sup>                                           | Effort to include all available studies, including contact with authors <sup>↵</sup>                                                                                                                                                                                                      | 6 <sup>↵</sup>                    |
| 10 <sup>↵</sup>                                          | Databases and registries searched <sup>↵</sup>                                                                                                                                                                                                                                            | 6 <sup>↵</sup>                    |
| 11 <sup>↵</sup>                                          | Search software used, name and version, including special features used (eg, explosion) <sup>↵</sup>                                                                                                                                                                                      | 6 <sup>↵</sup>                    |
| 12 <sup>↵</sup>                                          | Use of hand searching (eg, reference lists of obtained articles) <sup>↵</sup>                                                                                                                                                                                                             | 6 <sup>↵</sup>                    |
| 13 <sup>↵</sup>                                          | List of citations located and those excluded, including justification <sup>↵</sup>                                                                                                                                                                                                        | 8, Table 2, Fig 1 <sup>↵</sup>    |
| 14 <sup>↵</sup>                                          | Method of addressing articles published in languages other than English <sup>↵</sup>                                                                                                                                                                                                      | — <sup>↵</sup>                    |
| 15 <sup>↵</sup>                                          | Method of handling abstracts and unpublished studies <sup>↵</sup>                                                                                                                                                                                                                         | 6 <sup>↵</sup>                    |
| 16 <sup>↵</sup>                                          | Description of any contact with authors <sup>↵</sup>                                                                                                                                                                                                                                      | 6 <sup>↵</sup>                    |
| Reporting of methods should include <sup>↵</sup>         |                                                                                                                                                                                                                                                                                           |                                   |
| 17 <sup>↵</sup>                                          | Description of relevance or appropriateness of studies assembled for assessing the hypothesis to be tested <sup>↵</sup>                                                                                                                                                                   | 6-8 <sup>↵</sup>                  |
| 18 <sup>↵</sup>                                          | Rationale for the selection and coding of data (eg, sound clinical principles or convenience) <sup>↵</sup>                                                                                                                                                                                | 6-8 <sup>↵</sup>                  |
| 19 <sup>↵</sup>                                          | Documentation of how data were classified and coded (eg, multiple raters, blinding and interrater reliability) <sup>↵</sup>                                                                                                                                                               | 6-8 <sup>↵</sup>                  |
| 20 <sup>↵</sup>                                          | Assessment of confounding (eg, comparability of cases and controls in studies where appropriate) <sup>↵</sup>                                                                                                                                                                             | 7 <sup>↵</sup>                    |
| 21 <sup>↵</sup>                                          | Assessment of study quality, including blinding of quality assessors, stratification or regression on possible predictors of study results <sup>↵</sup>                                                                                                                                   | 6-7 <sup>↵</sup>                  |
| 22 <sup>↵</sup>                                          | Assessment of heterogeneity <sup>↵</sup>                                                                                                                                                                                                                                                  | 7 <sup>↵</sup>                    |
| 23 <sup>↵</sup>                                          | Description of statistical methods (eg, complete description of fixed or random effects models, justification of whether the chosen models account for predictors of study results, dose-response models, or cumulative meta-analysis) in sufficient detail to be replicated <sup>↵</sup> | 7-8 <sup>↵</sup>                  |
| 24 <sup>↵</sup>                                          | Provision of appropriate tables and graphics <sup>↵</sup>                                                                                                                                                                                                                                 | Tables 2-7, Figs 2-7 <sup>↵</sup> |
| Reporting of results should include <sup>↵</sup>         |                                                                                                                                                                                                                                                                                           |                                   |
| 25 <sup>↵</sup>                                          | Graphic summarizing individual study estimates and overall estimate <sup>↵</sup>                                                                                                                                                                                                          | Figs 3-7 <sup>↵</sup>             |
| 26 <sup>↵</sup>                                          | Table giving descriptive information for each study included <sup>↵</sup>                                                                                                                                                                                                                 | Table 2 <sup>↵</sup>              |
| 27 <sup>↵</sup>                                          | Results of sensitivity testing (eg, subgroup analysis) <sup>↵</sup>                                                                                                                                                                                                                       | Fig 3, Table 3 <sup>↵</sup>       |
| 28 <sup>↵</sup>                                          | Indication of statistical uncertainty of findings <sup>↵</sup>                                                                                                                                                                                                                            | 12-16 <sup>↵</sup>                |
